# Supplementary material for: White light emission from quantum dot and a UV-visible emitting Pd-complex on its surface
Source: Royal Society of Chemistry journal article supplement (doi:10.1039/c6ra22985a), 2016-01-01
Supplement: c6ra22985a1.pdf [file c6ra22985a1.pdf]

## **White Light Emission from Quantum Dot and a UV-visible Emitting Pd-complex on Its Surface**

Madhulekha Gogoi\* and Arun Chattopadhyay

Department of Chemistry and Centre for Nanotechnology, IIT  
Guwahati, North Guwahati, PIN- 781039, Assam, India

\*E-mail ID: madhulekha@gmail.com

## **Electronic Supplementary Information**

### **Characterization techniques used**

Powder X-ray diffraction was performed with D2 phaser (Bruker). UV-Visible absorption spectra were collected using Lambda 25 spectrometer (Perkin Elmer) and PL spectra by Fluoromax-4 spectrometer (Horriba Scientific). TEM and EDX characterizations were performed with JEM 2100 (JEOL) transmission electron microscope at an accelerating voltage of 200 kV. FTIR spectra were acquired using a Nicolet iS10 (Thermo Scientific) and a Spectrum 2 (Perkin Elmer). Nuclear magnetic resonance (NMR) spectra were collected using a Ascend 600 MHz spectrometer (Bruker) while Electron spin resonance (ESR) spectra by JES-FA 200 spectrometer (JEOL). Time resolved photoluminescence (TRPL) analysis were performed using FSP920 (Eddinburg Instruments) and Quanta Master 30plus (Photon Technologies International). Elemental compositions were estimated by AA240 (Varian) spectrometer. The “go cie” software was used to calculate the chromaticity point in the CIE (1931) diagram. The digital photographs were taken by DSLR D5100 (Nikon). X-ray photoelectron spectra (XPS) of the samples were recorded with a custom built ambient pressure photoelectron spectrometer (APPES) (Prevac, Poland) equipped with a VG Scienta’s R3000HP analyzer and MX650 monochromator [S1]. Monochromatic Al K $\alpha$  X-rays were generated at 200 W and used for measuring the X-ray photoelectron spectrum (XPS) of the above mentioned samples. Base pressure in the analysis chamber was maintained in the range of  $5 \times 10^{-10}$  Torr. The energy resolution of the spectrometer was set at 0.7 eV at a pass energy of 50 eV. Binding energy (BE) was calibrated with respect to Au 4f<sub>7/2</sub> core level at 84.0 eV. Samples were flooded with low energy electrons for efficient charge neutralisation. The electrochemical behavior of the complexes was studied by cyclic voltammetry at 298 K. Cyclic voltammograms (CVs) of complex has been recorded in CH<sub>2</sub>Cl<sub>2</sub> solutions containing 0.10 M [(nBu)<sub>4</sub>N]ClO<sub>4</sub> as supporting electrolyte at a glassy carbon working electrode, a platinum wire counter electrode, and a Ag/AgCl reference electrode. Ferrocene was used as an internal standard, and potentials are referenced versus the ferrocenium/ferrocene couple (Fc<sup>+</sup>/Fc).

### **Measurement of quantum yield (QY)**

The measurement of photoluminescence quantum yield (QY) has been carried out for Qdot and QDC by using the comparative method of Williams et al. The equation used is given below (Eq. 1):

$$\phi_s = \phi_{st} \left( \frac{slope_s}{slope_{st}} \right) \left( \frac{\eta_s^2}{\eta_{st}^2} \right)$$

(1)

Where,  $\phi_s$  and  $\phi_{st}$  are quantum efficiencies of sample and standard,  $\eta_s$  and  $\eta_{st}$  are refractive indices of sample and standard respectively. Here, Tryptophan of quantum efficiency 13% is used as the standard. For determination of the slope, five solutions were prepared for both sample and standard with absorbance below 0.1.

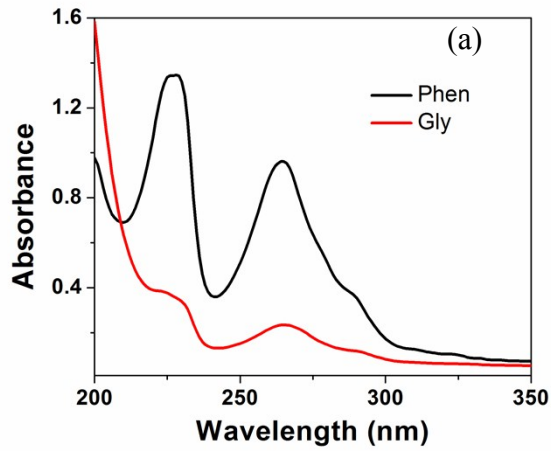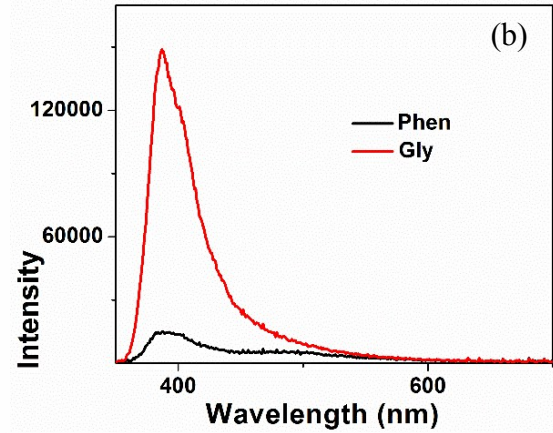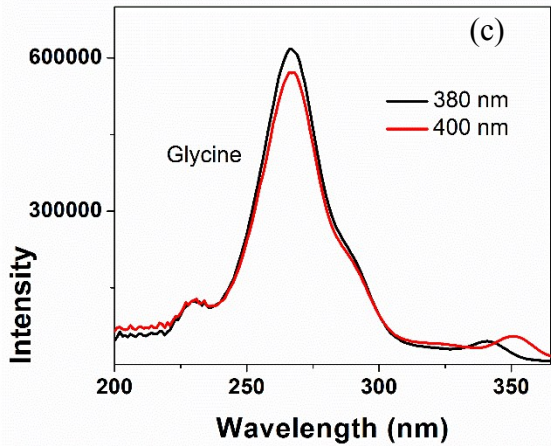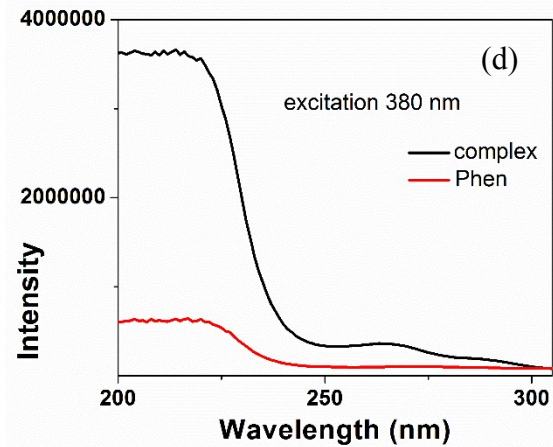

**Figure S1.** (a) Absorption spectra and (b) emission spectra of glycine and 1,10-phenanthroline ligands (solution in water) with excitation wavelength being set at 270 nm. Excitation spectra of (c) glycine (with emission maxima being set at 380 and 400 nm) and (d) complex and phen ligand (with emission maximum at 380 nm).

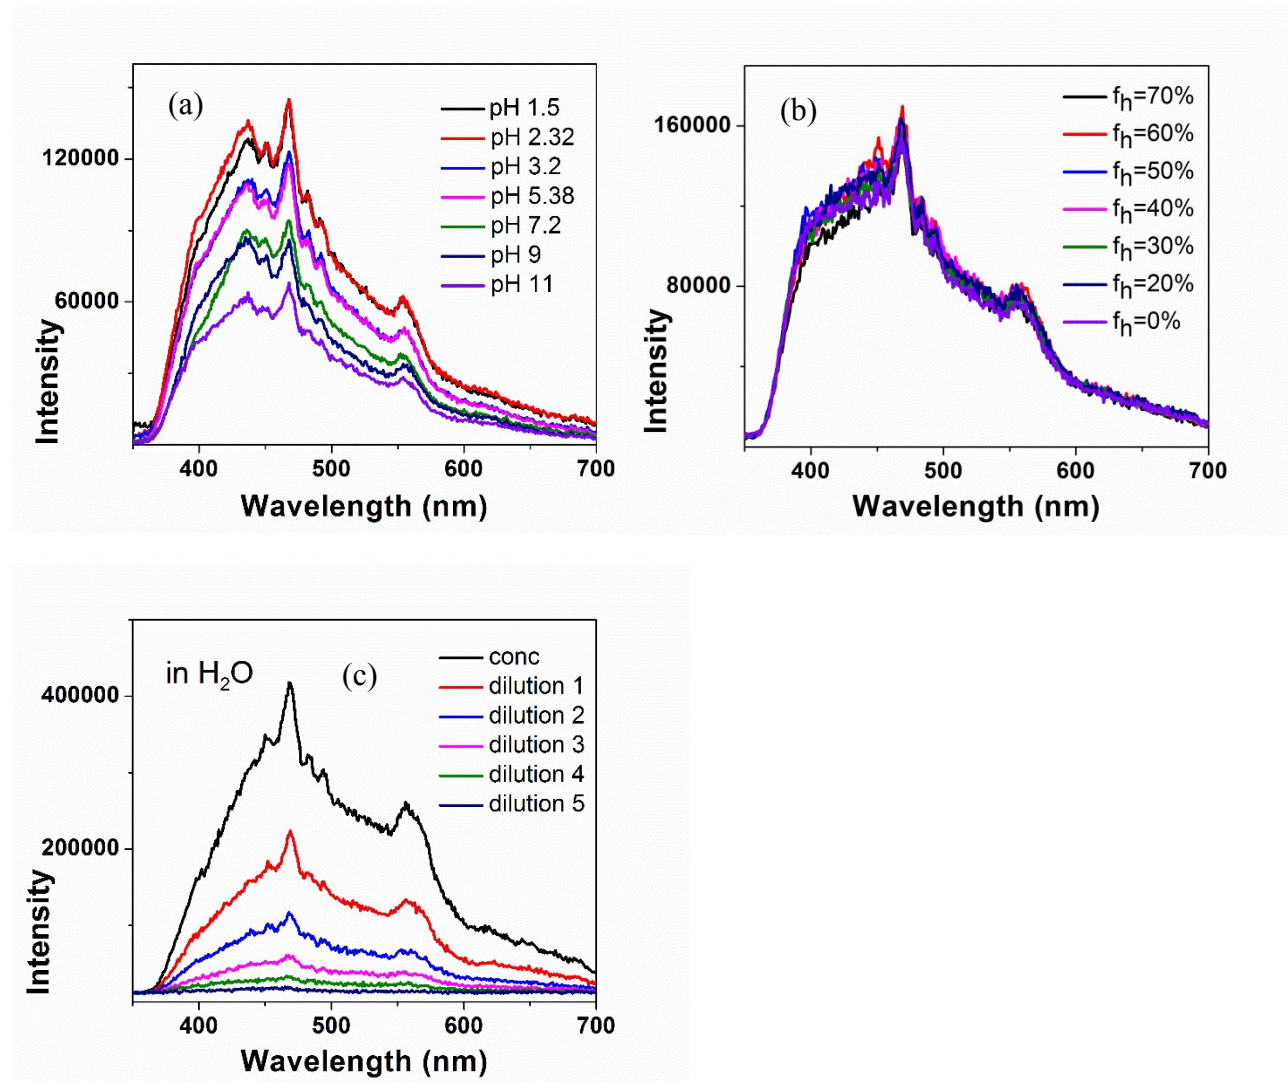

**Figure S2.** Emission spectra of complex (a) in water recorded at different pH values, (b) in THF/hexane mixed solvents with different fractions of hexane volume ( $f_h$ ) and (c) in water with dilutions. Excitation wavelength in all studies was 270 nm.

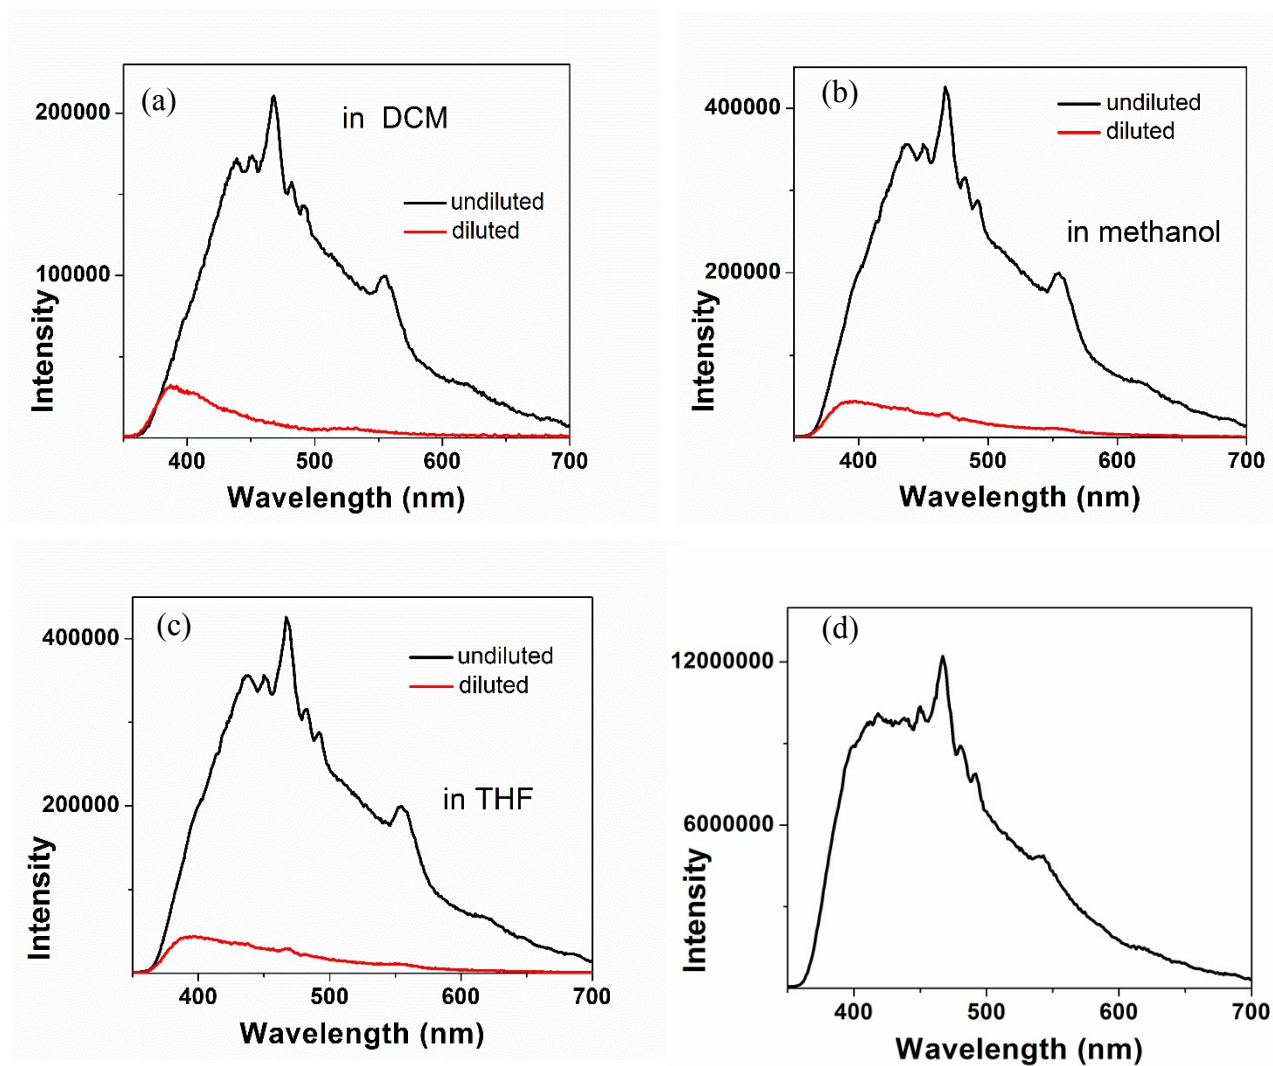

**Figure S3.** Emission spectra of complex the (as-prepared solution of concentration 0.4 mM and diluted solution with concentration 0.02 mM) in different solvents: (a) dichloromethane, (b) methanol and (c) tetrahydrofuran and (d) solid state fluorescence of the complex. Excitation wavelength was 270 nm.



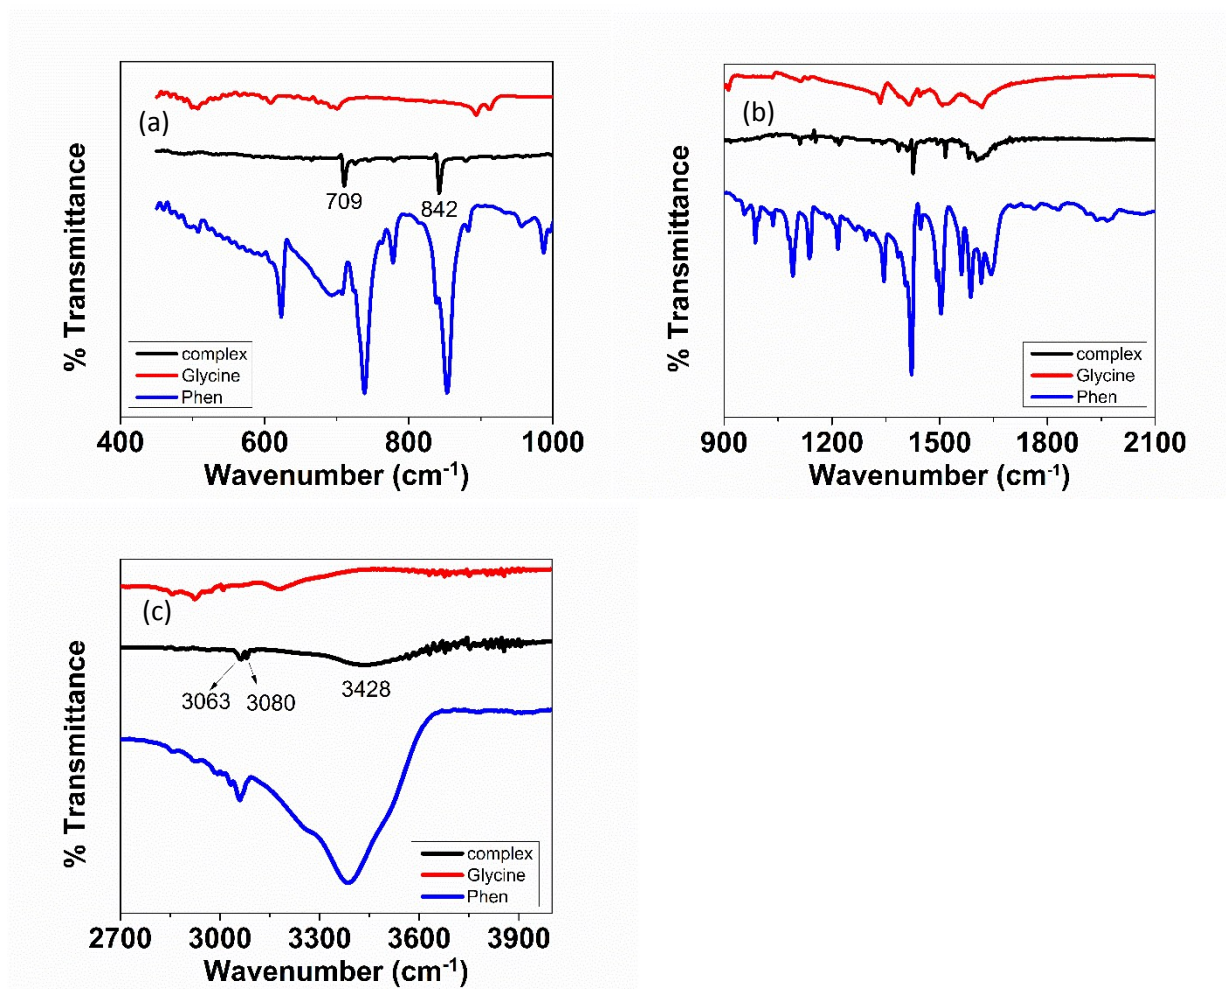

**Figure S4.** Comparative FTIR spectra of phenanthroline, glycine and the complex.

**Table S1.** FTIR spectral data comparison among phenanthroline, glycine and the complex (symbol P denotes present data).

| Wavenumber<br>(cm <sup>-1</sup> ) | Functional<br>groups                                                                                          | Phenanthroline | Glycine                 | Complex   |
|-----------------------------------|---------------------------------------------------------------------------------------------------------------|----------------|-------------------------|-----------|
| 3428                              | NH <sub>stretch</sub>                                                                                         | P (3383) broad |                         | P (broad) |
| 3081                              | NH <sup>3+</sup> <sub>antisymm</sub>                                                                          |                | P (3175,<br>zwitterion) | P         |
| 3063                              | NH <sup>3+</sup> <sub>symm</sub>                                                                              | P              | P (3075,<br>zwitterion) | P         |
| 2927                              | CH <sub>2 stretch</sub>                                                                                       | P              | P                       | P         |
| 2854                              | CH <sub>2 stretch</sub>                                                                                       | P              | P                       | P         |
| 1640                              | quadruple for<br>ring frequencies                                                                             | P              |                         |           |
| 1618                              | quadruple for<br>ring frequencies                                                                             | P              | P                       | P (1600)  |
| 1584                              | quadruple for<br>ring frequencies                                                                             | P              | P                       |           |
| 1562                              | quadruple for<br>ring frequencies                                                                             | P              |                         |           |
| 1516                              | NH <sup>3+</sup> <sub>bending</sub><br>/COO <sup>-</sup> antisymm<br>for zwitterion<br>C=C <sub>stretch</sub> | P (1500)       | P (broad)               | P         |
| 1446                              | CH <sub>2 deform</sub>                                                                                        | P              | P                       |           |
| 1420                              | COO <sup>-</sup> symm for                                                                                     | P              | P                       | P (1424)  |

|      |                                                     |   |          |                              |
|------|-----------------------------------------------------|---|----------|------------------------------|
|      | zwitterion)                                         |   |          |                              |
| 1383 | vibrational<br>stretch of COO-                      | P | P        | P                            |
| 1343 | CH <sub>2</sub> deform / C-N stretch (aromatic)     | P | P (1338) | P (1341)                     |
| 1219 | In plane H deformation motion                       | P |          | P                            |
| 1206 | In plane H deformation motion                       | P |          | P                            |
| 1136 | In plane H deformation motion                       | P | P        | P (1141)                     |
| 1110 | C-N stretch (aliphatic)                             |   | P        | P                            |
| 1052 | C-O stretching                                      |   |          | P                            |
| 912  | N-H wag                                             |   | P        | P (920)                      |
| 893  | CN <sup>+</sup> /CC <sup>+</sup>                    |   | P        | P                            |
| 879  | Out of plane motion of ring H                       | P |          | P                            |
| 853  | Out of plane motion of ring H                       | P |          | P (842)<br>decreased sharply |
| 776  | Out of plane motion of ring H                       | P |          | P                            |
| 738  | Out of plane motion of ring H                       | P |          | P (747)<br>decreased sharply |
| 709  | Out of plane motion of ring H                       | P | P (711)  | P (711)                      |
| 666  | In plane motion of COO- group adsorbed onto surface |   |          | P                            |
| 607  | In plane motion of COO- group adsorbed onto surface |   | P        |                              |



|     |                                                     |   |   |  |
|-----|-----------------------------------------------------|---|---|--|
| 514 | In plane motion of COO- group adsorbed onto surface | P | P |  |
|-----|-----------------------------------------------------|---|---|--|

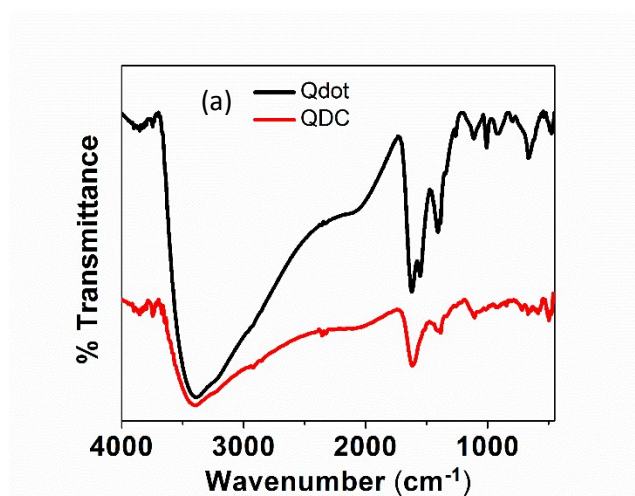

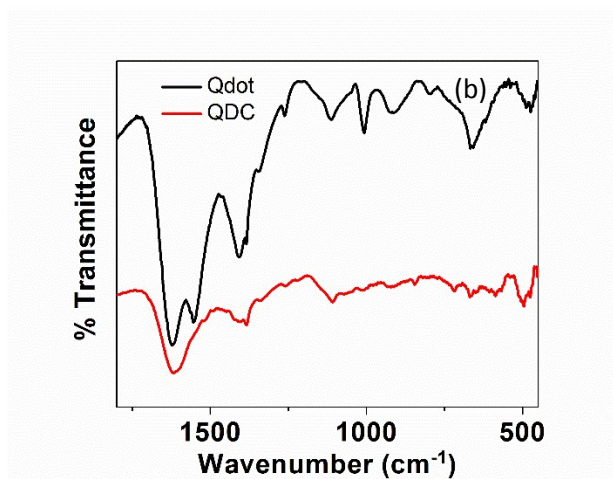

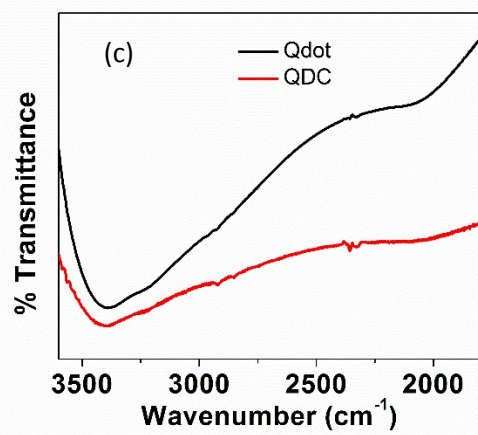

**Figure S5.** Comparative FTIR spectra of Qdot and QDC.

**Table S2.** FTIR spectral data comparison between Qdot and QDC. Here P denotes present data.

| Wavenumber (cm <sup>-1</sup> ) | Functional groups                                   | Qdot | QDC                                    |
|--------------------------------|-----------------------------------------------------|------|----------------------------------------|
| 472                            | M-N stretching                                      |      | P                                      |
| 507                            | In plane motion of COO- group adsorbed onto surface |      | P                                      |
| 661                            | C-H bending                                         | P    |                                        |
| 667                            | In plane motion of COO- group adsorbed onto surface |      | P                                      |
| 720                            | Out of plane motion of ring H                       |      | P                                      |
| 796                            | C-H out of plane deformation                        | P    |                                        |
| 844                            | Out of plane motion of ring H                       |      | P                                      |
| 796                            | C-H out of plane deformation                        | P    |                                        |
| 1007                           | C-H in plane deformation                            | P    |                                        |
| 1114                           | -C-O-M / C-H in plane deformation                   | P    | P (observed at 1105 cm <sup>-1</sup> ) |
| 1260                           | C-H in plane deformation                            | P    |                                        |
| 1385                           | vibrational stretch of COO-                         | P    | P (weak)                               |
| 1406                           | symmetric stretch of COO-                           | P    | P (weak)                               |
| 1555                           | antisymmetric stretch of COO-                       | P    |                                        |
| 1616 (broad)                   | quadruple for ring frequencies                      |      | P                                      |
| 1620                           | O-H bending vibration                               | P    |                                        |
| 2851                           | CH <sub>2</sub> antisymmetric stretching            |      | P                                      |

|      |                                                     |   |   |
|------|-----------------------------------------------------|---|---|
| 2920 | CH <sub>2</sub> symmetric stretching                |   | P |
| 3385 | O-H stretching vibration / N-H stretching vibration | P | P |

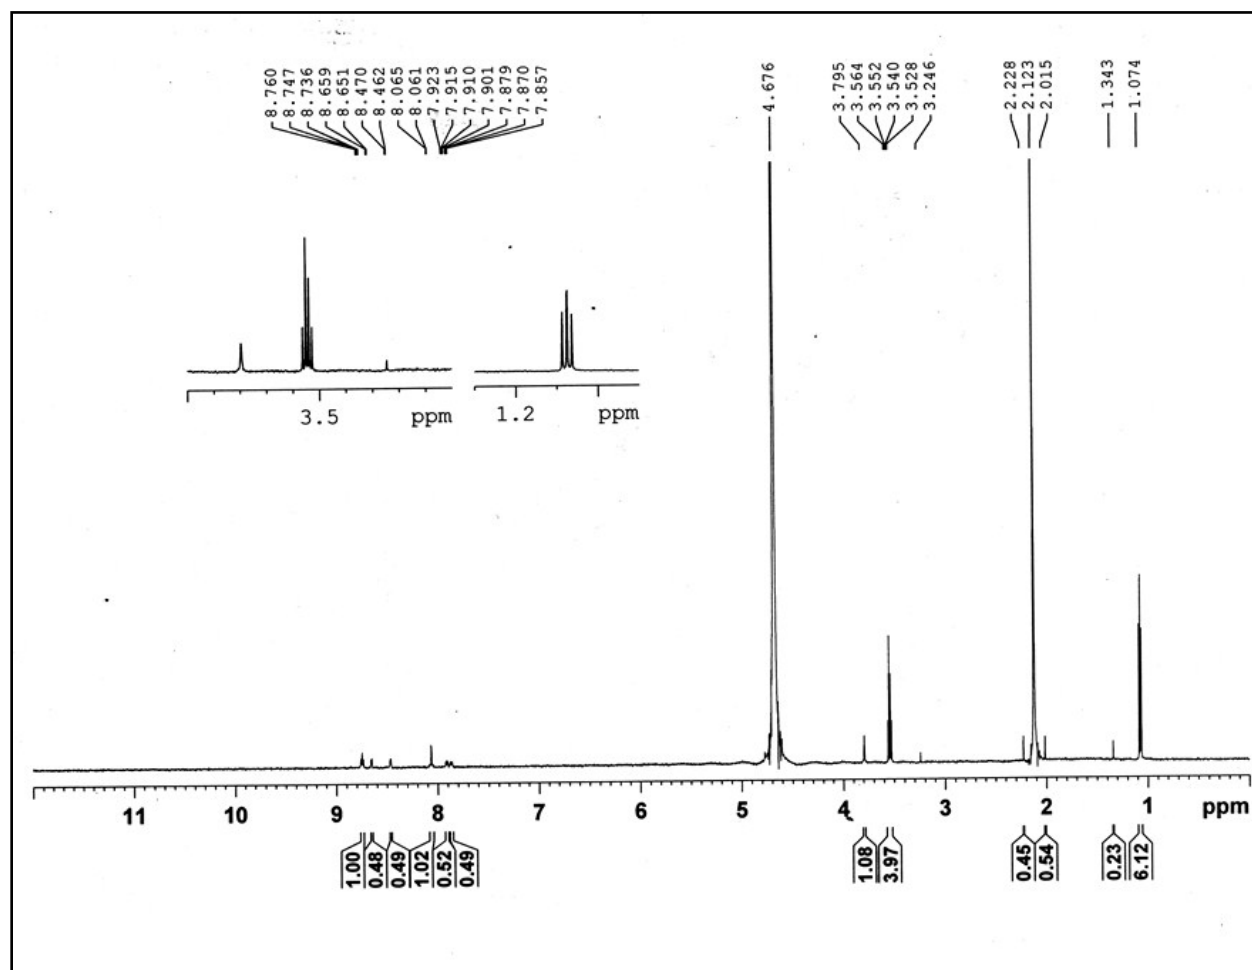

**Figure S6.** <sup>1</sup>H-NMR spectra of the complex.

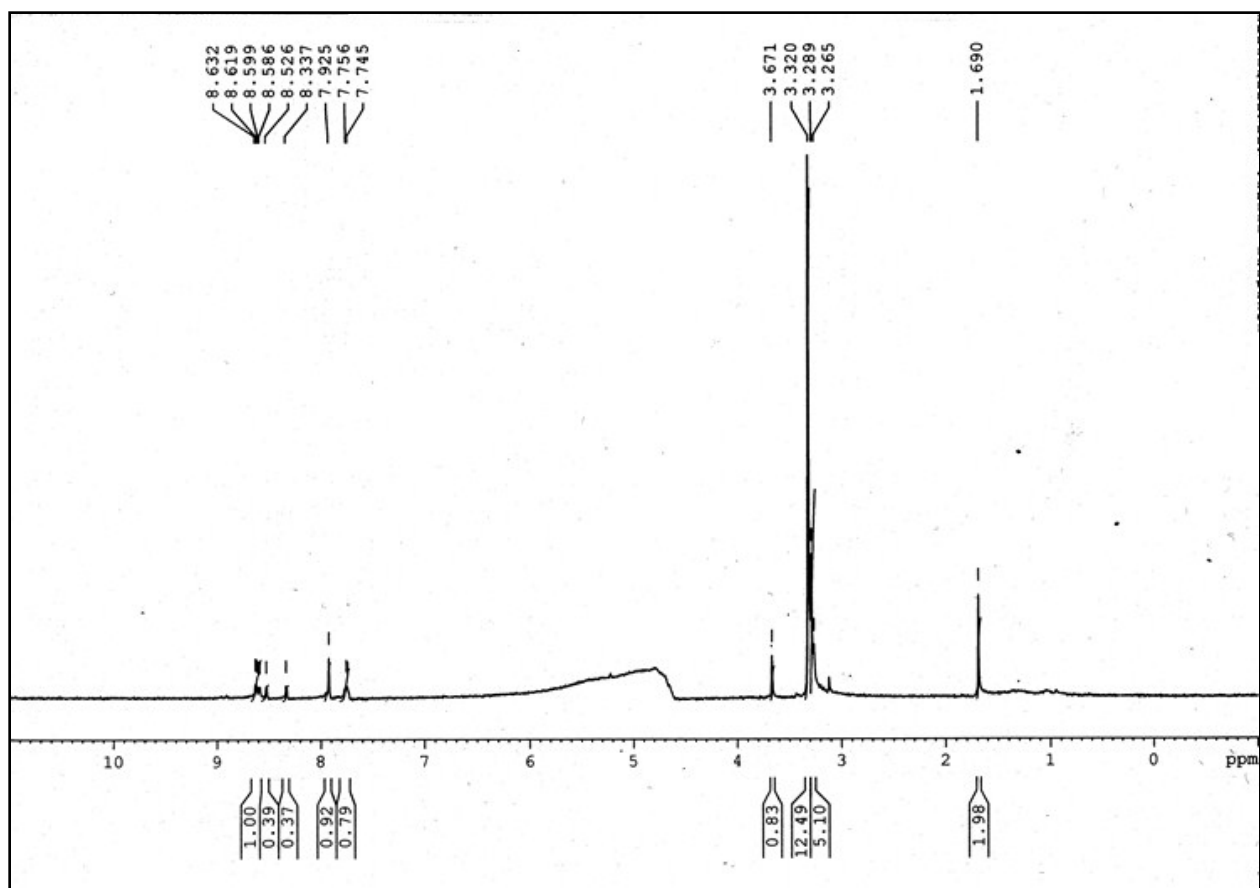

**Figure S7.**  $^1\text{H}$ -NMR spectra of the QDC.



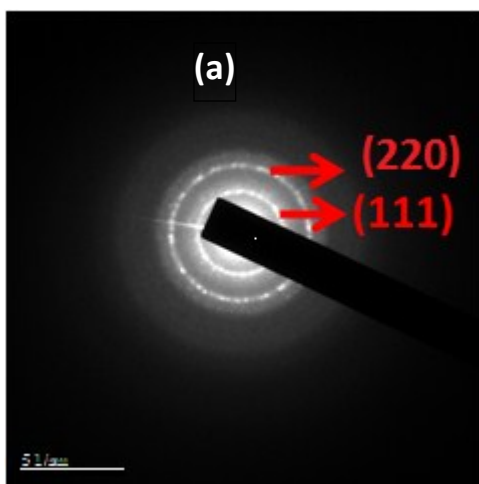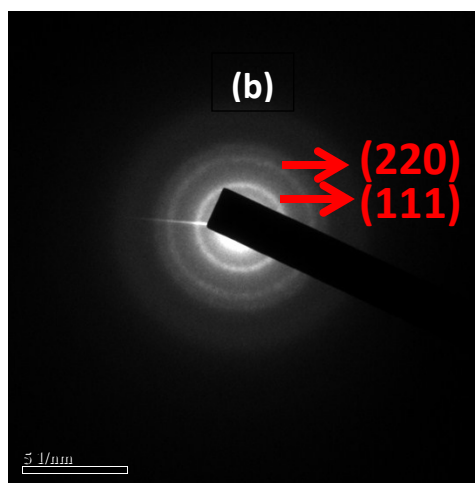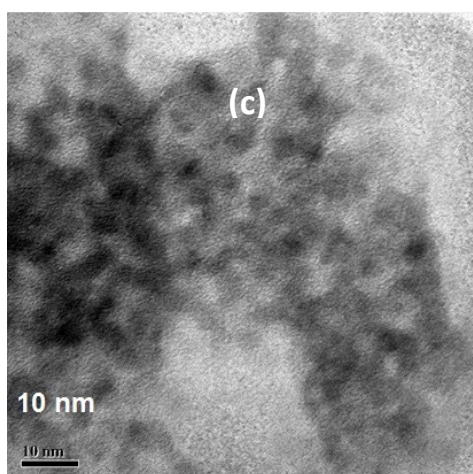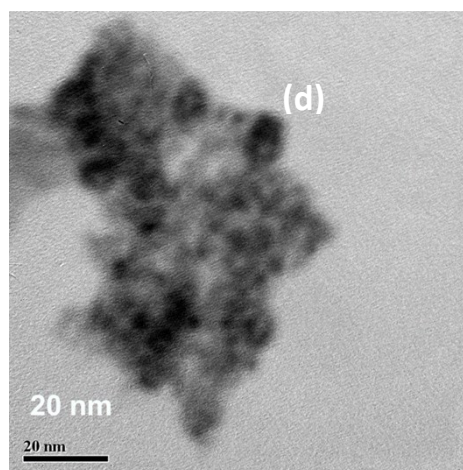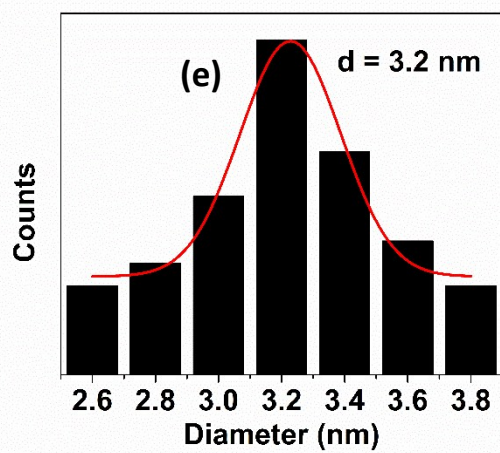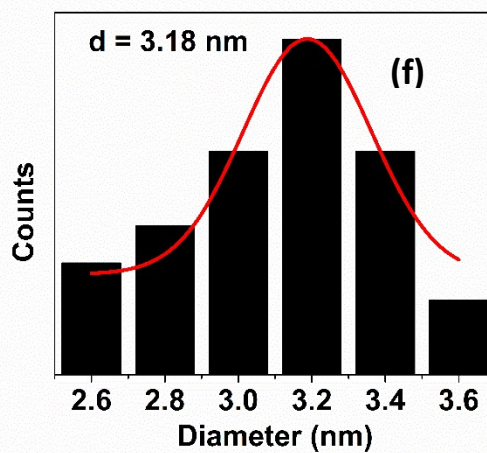

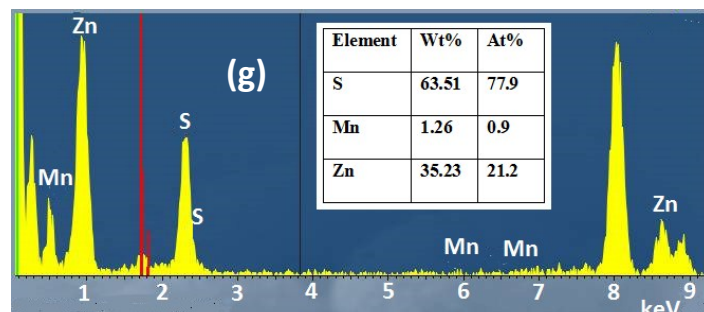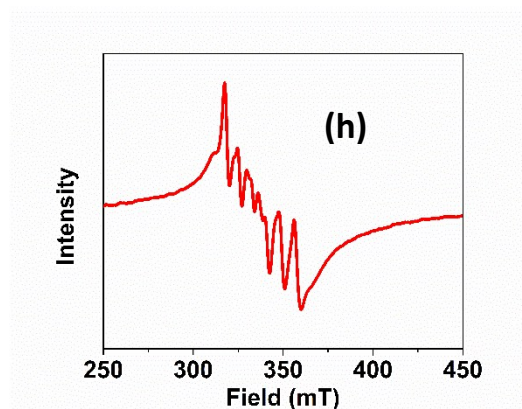

**Figure S8.** Selected area diffraction pattern (SAED) of (a) Qdot and (b) QDC. TEM images of (c) Qdot and (d) QDC. Particle size distribution plot of (e) Qdot and (f) QDC. Particle sizes were calculated from the TEM images. (g) EDS spectrum of Qdot and (h) ESR spectrum of QDC.

**Table S3.** Compositional analysis of Qdot.

| Element | Atomic % | Conc (ppm) | Ratio |
|---------|----------|------------|-------|
|         | EDS      | AAS        |       |
| Zn      | 21.2     | 3.98       | 0.04  |
| Mn      | 0.9      | 0.16       | 0.04  |

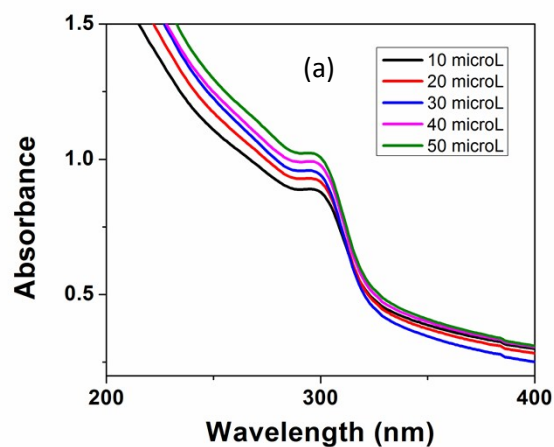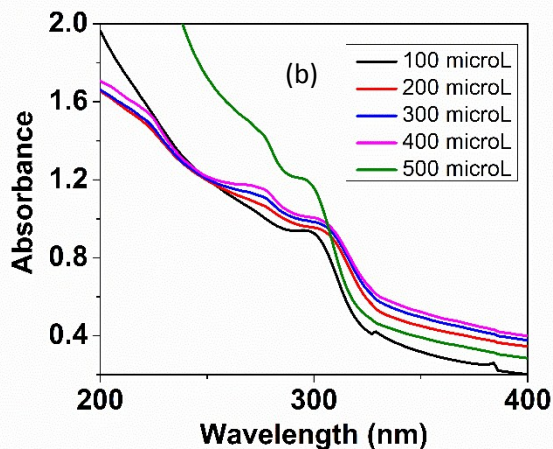

**Figure S9.** UV-Visible absorption spectra of QDC formed by adding different volumes of complex solutions ( $0.1 \mu\text{M}$  with respect to  $\text{Pd}^{2+}$  ion).

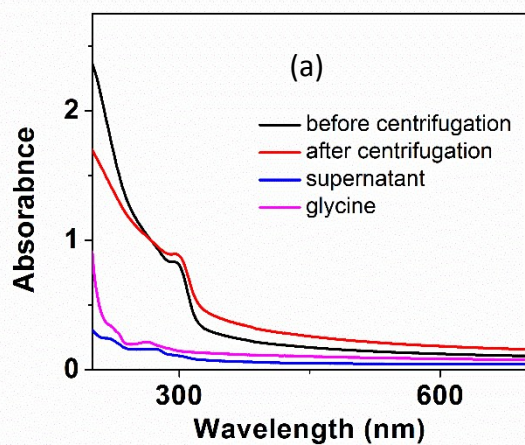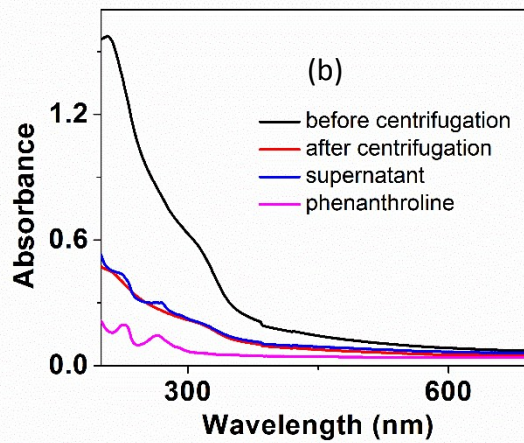

**Figure S10.** UV-Visible absorption spectra of (a) Qdot solution treated with glycine solution ( $13.3 \text{ mM}$ ) and (b) Qdot solution treated with phenanthroline solution ( $4.4 \text{ mM}$ ).

**Table S4.** Absorption peaks observed from Figure S7.

| Sample name    | Peak positions in the absorption spectra |
|----------------|------------------------------------------|
| Qdot           | 300 nm                                   |
| QDC            | 300 nm, 272 nm and 220 nm                |
| Complex        | 272 nm and 220 nm                        |
| Glycine        | 268 nm and 224 nm                        |
| Phenanthroline | 265 nm and 227 nm                        |

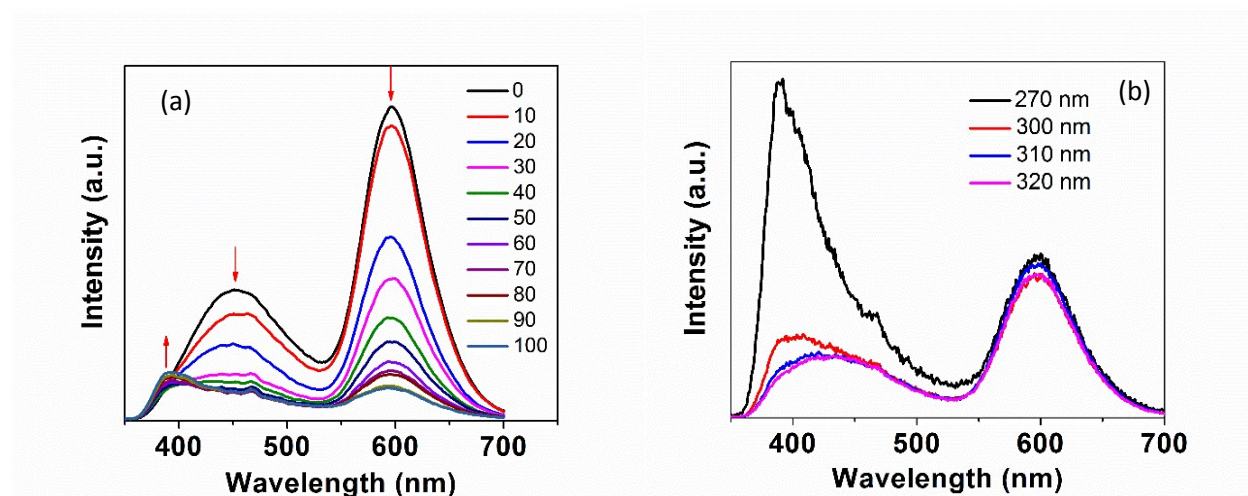

**Figure S11.** Fluorescence spectra of (a) QDC obtained by addition of different volumes (in  $\mu\text{L}$ ) of complex solution (0.1  $\mu\text{M}$ ) at excitation 300 nm and (b) QDC excited by different wavelengths.



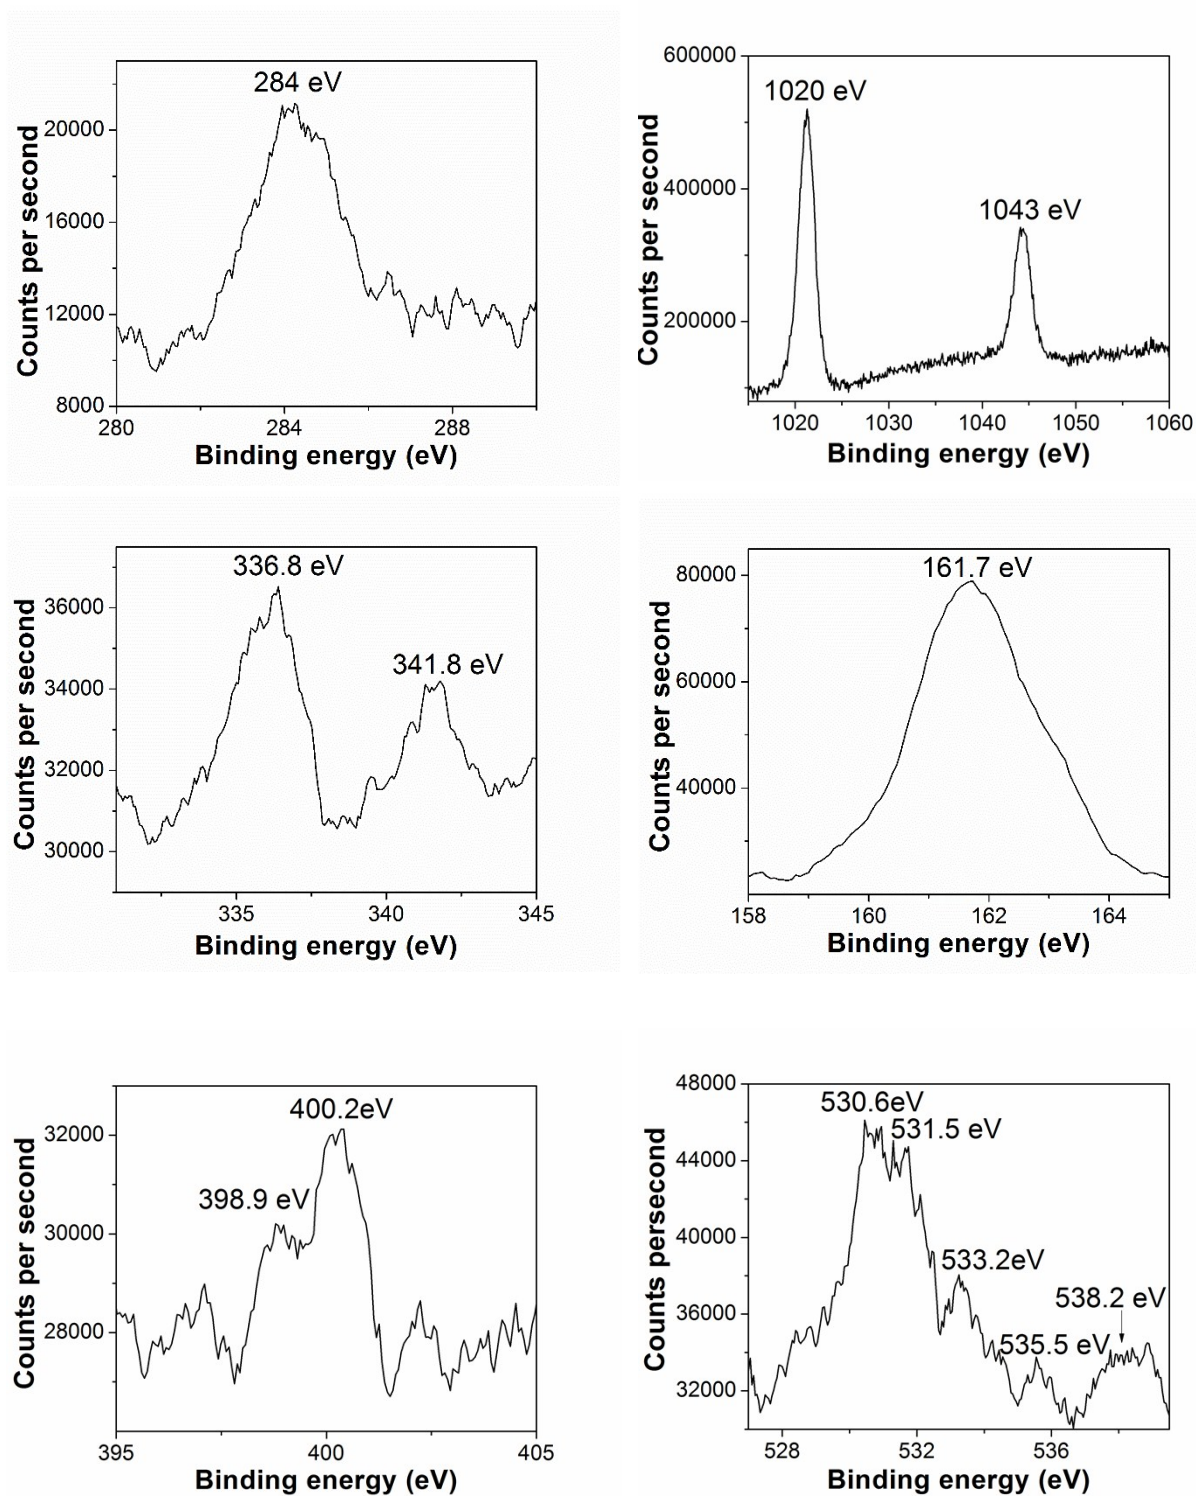

**Figure S12.** XPS spectra of (a) C 1s, (b) Zn 2p, (c) Pd 3d, (d) S 2p, (e) N 1s and (f) O 1s peak of QDC.

In the XPS spectra of C 1s (Fig. S12(a)), the peak at 284 eV corresponds to aliphatic carbon (C–C) of glycine, phenanthroline ligands [S2]. The Zn 2p spectra (Fig. S12(b)) has two peaks at 1020 eV and 1044 eV. These two peaks are attributed to the presence of Zn<sup>2+</sup> [S3]. The Pd 3d spectra (Fig. S12(c)) shows the presence of peaks at 336.8 eV and 341.8 eV which correspond to Pd 3d<sub>3/2</sub> and 3d<sub>5/2</sub> electrons and proves the presence of Pd<sup>2+</sup> only [S4]. In the S 2p spectra (Fig. S12(d)), the only peak at 161.7 eV corresponding to bound thiols has been observed [S5]. N1s XPS spectra (Fig. S12(e)) consists of two peaks: at 400.2 eV corresponding to zwitterionic NH<sub>3</sub><sup>+</sup> of glycine [S6] and at 398.9 eV corresponding to metal-N [S7] which may be of phenanthroline bonded to Pd. The peaks observed in the XPS spectra of O1s (Fig. S12(f)) are assigned as: 530.6 eV to O bound to metal, 531.5 eV to –OH [S5], 533.2 eV to C=O [S8], 535.5 eV to satellite [S9] and 538.2 eV to bridging O atom [S10].



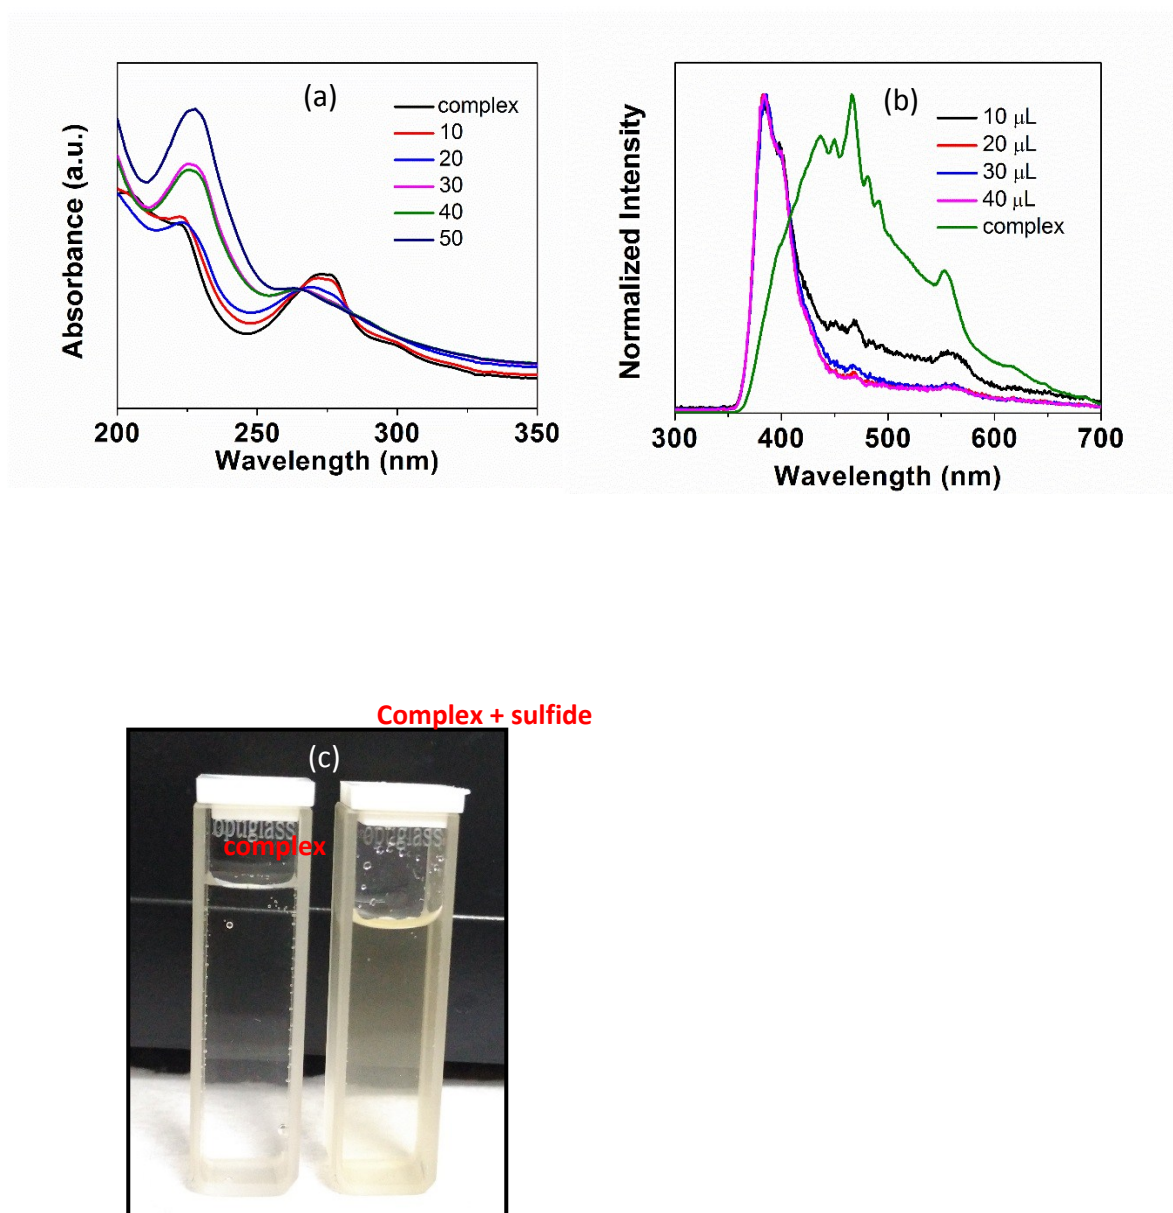

**Figure S13.** (a) UV-Visible absorption spectra, (b) photoluminescence spectra (excitation 270 nm) of the complex added with different volumes of  $\text{Na}_2\text{S}$  solution (in  $\mu\text{L}$ ) and (c) Digital photographs of complex solution before and after addition of sulfide solution.

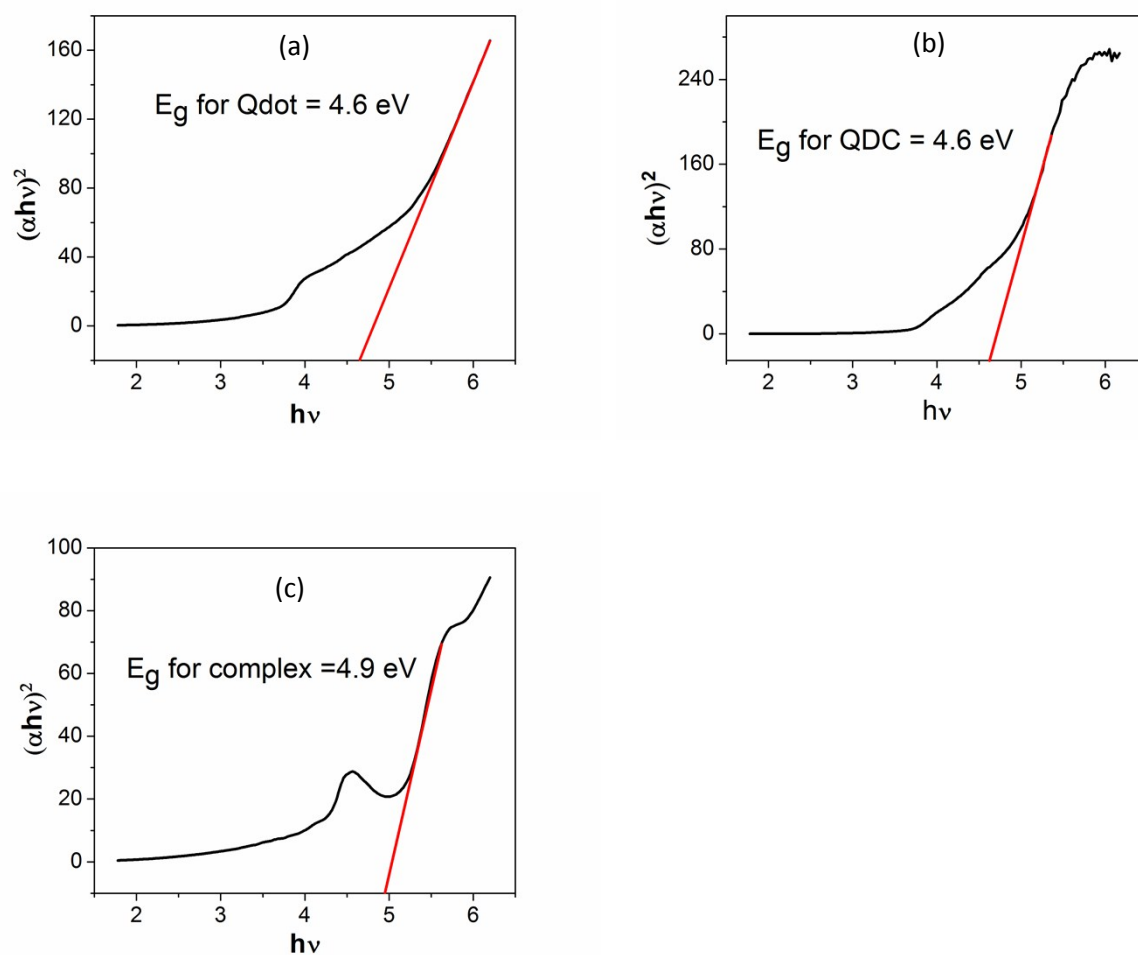

**Figure S14.** Gauc's plot of (a) Qdot, (b) QDC and (c) complex.

**Table S5.** Fluorescence decay parameters of Qdot and QDC monitored at 450 nm (excitation 290 nm LED)

| Sample | $\alpha_1(\%)$ | $\tau_1$ (ns) | $\alpha_2(\%)$ | $\tau_2(\text{ns})$ | $\tau_{av}(\text{ns})$ | $\chi^2$ |
|--------|----------------|---------------|----------------|---------------------|------------------------|----------|
| Qdot   | 45             | 2.1           | 27.98          | 27.98               | 26.46                  | 1.07     |
| QDC    | 32.26          | 1.45          | 67.74          | 8.9                 | 7.66                   | 0.964    |

**Table S6.** Phosphorescence decay parameters of Qdot, QDC and complex monitored at 597 nm (excitation 320 nm), 390 nm (excitation 270 nm) and 390 nm (excitation 270 nm) respectively

| Sample  | $\alpha_1(\%)$ | $\tau_1$ ( $\mu\text{s}$ ) | $\alpha_2(\%)$ | $\tau_2(\mu\text{s})$ | $\alpha_3(\%)$        | $\tau_3(\mu\text{s})$ | $\tau_{av}$ | $\chi^2$ |
|---------|----------------|----------------------------|----------------|-----------------------|-----------------------|-----------------------|-------------|----------|
| complex | 99.99          | 5.1                        | -0.65          | 6.7                   | 0.001                 | 9.7                   | 5           | 1.1      |
| QDC     | -0.005         | 3.5                        | 99.99          | 1.7                   | $1.2 \times 10^{-11}$ | 8.9                   | 1.69        | 1.2      |
| Qdot    | 0.126          | 785                        | 16055          | 6                     | -                     | -                     | 6.79        | 0.99     |

**References:**

- [S1] K. Roy, C. P. Vinod and C. S. Gopinath, J. Phys. Chem. C 117, 4717, 2013.
- [S2] B. A. de Angelis, C. Rizzo, S. Contarini and S. P. Howlett, Appl. Surface Sci. 51, 177-183, 1991.
- [S3] P. Sakthivel, S. Muthukumaran and M. Ashokkumar, J. Mater. Sci.: Mater. Electron. 26, 1533-1542, 2015.
- [S4] V. N. Mikhaylov, V. N. Sorokoumov, K. A. Korvinson, A. S. Novikov and I. A. Balova, Organometallics 35, 1684-1697, 2016.
- [S5] M. Gogoi, P. Deb, G. Vasan, P. Keil and A. Erbe, Appl. Surface Sci. 258, 9685-9691, 2012.
- [S6] M. Z. Atassi and E. Appella, Methods in Protein Structure Analysis, Springer Science and Business Media 2013, pp. 256.

- [S7] S. Seal, Chemical Mechanical Planarization VI: Proceedings of the International Symposium, The Electrochemical Society 2003, pp. 58.
- [S8] J. L. Droulas, T. M. Duc and Y. Jugnet, The Empty The Thin Films, Supplement no. 258, 39-41, 1991.
- [S9] C. Mustin, P. D. Donato and R. Benoit, Appl. Surface Sci. 68, 147-158, 1993.
- [S10] H. Goretzki, H. U. Chun, M. Summet and R. Bruckner, J. Non-crystalline Solids, 42, 49-60, 1980.
